# Supplementary material for: Navigator programme for hospitalised adults experiencing homelessness: protocol for a pragmatic randomised controlled trial
Source: PubMed Central journal article supplement — BMJ Open. 2022 Dec 14;12(12):e065688. doi: 10.1136/bmjopen-2022-065688 (PMC9756200; doi:10.1136/bmjopen-2022-065688), 2022-12-14
Supplement: bmjopen-2022-065688supp002.pdf [file bmjopen-2022-065688supp002.pdf]

**Online Supplemental File 2: Adjudication Rules for Primary Outcome**

| <b>A</b>                                    | <b>B</b>                                      | <b>C</b>                       | <b>D</b>                        | <b>E</b>                                          |
|---------------------------------------------|-----------------------------------------------|--------------------------------|---------------------------------|---------------------------------------------------|
| <b>Patient 30-day Interview Self-Report</b> | <b>Primary Care Office Report<sup>1</sup></b> | <b>Adjudication of A and B</b> | <b>ICES Administrative Data</b> | <b>Final Adjudication (Yes if C=Yes or D=Yes)</b> |
| Yes                                         | Yes                                           | Yes                            | Yes                             | Yes                                               |
| Yes                                         | Yes                                           | Yes                            | No                              | Yes                                               |
| Yes                                         | Yes                                           | Yes                            | n.d.                            | Yes                                               |
| Yes                                         | No                                            | No                             | Yes                             | Yes                                               |
| Yes                                         | No                                            | No                             | No                              | No                                                |
| Yes                                         | No                                            | No                             | n.d.                            | No                                                |
| Yes                                         | n.d.                                          | Yes                            | Yes                             | Yes                                               |
| Yes                                         | n.d.                                          | Yes                            | No                              | Yes                                               |
| Yes                                         | n.d.                                          | Yes                            | n.d.                            | Yes                                               |
| No                                          | Yes                                           | Yes                            | Yes                             | Yes                                               |
| No                                          | Yes                                           | Yes                            | No                              | Yes                                               |
| No                                          | Yes                                           | Yes                            | n.d.                            | Yes                                               |
| No                                          | No                                            | No                             | Yes                             | Yes                                               |
| No                                          | No                                            | No                             | No                              | No                                                |
| No                                          | No                                            | No                             | n.d.                            | No                                                |
| No                                          | n.d.                                          | No                             | Yes                             | Yes                                               |
| No                                          | n.d.                                          | No                             | No                              | No                                                |
| No                                          | n.d.                                          | No                             | n.d.                            | No                                                |
| n.d.                                        | Yes                                           | Yes                            | Yes                             | Yes                                               |
| n.d.                                        | Yes                                           | Yes                            | No                              | Yes                                               |
| n.d.                                        | Yes                                           | Yes                            | n.d.                            | Yes                                               |
| n.d.                                        | No                                            | No                             | Yes                             | Yes                                               |
| n.d.                                        | No                                            | No                             | No                              | No                                                |
| n.d.                                        | No                                            | No                             | n.d.                            | No                                                |
| n.d.                                        | n.d.                                          | No                             | Yes                             | Yes                                               |
| n.d.                                        | n.d.                                          | No                             | No                              | No                                                |
| n.d.                                        | n.d.                                          | No                             | n.d.                            | No                                                |

n.d. = no data.

<sup>1</sup>The primary care provider (PCP) office will be contacted under any of the following circumstances: (1) participant reports PCP visit at the 30-day interview, (2) participant reports no PCP visit at the 30-day interview AND a PCP is identified at the baseline interview or 30-day interview, or (3) participant misses the 30-day interview AND a PCP is identified at the baseline interview.
